# Supplementary material for: Phosphatidylethanolamine Improves Postnatal Growth Retardation by Regulating Mucus Secretion of Intestinal Goblet Cells in Piglets
Source: MDPI journal article supplement (doi:10.3390/ani14081193), 2024-04-16
Supplement: s1 [file s1]

Table S1. Ingredients and nutrient composition of the diets (g/kg, as-fed basis)

| Item                            | Piglet weaning diet |
|---------------------------------|---------------------|
| Ingredients                     |                     |
| Corn                            | 23.93               |
| Extruded corn                   | 35.00               |
| Soybean                         | 8.00                |
| Fermented soybean               | 9.00                |
| Whey powder                     | 6.00                |
| Fish meal                       | 4.00                |
| Plasma protein powder           | 2.00                |
| Soybean oil                     | 1.00                |
| Glucose                         | 3.00                |
| Sucrose                         | 2.00                |
| 98% <i>L</i> -lysine            | 0.40                |
| <i>DL</i> -methionine           | 0.11                |
| <i>L</i> -threonine             | 0.12                |
| Alanine                         | 1.59                |
| Carrier                         | 0.90                |
| Organic acid calcium            | 0.60                |
| Dicalcium phosphate             | 1.00                |
| Choline chloride, 50%           | 0.01                |
| Antioxidant                     | 0.05                |
| Mineral premix <sup>1</sup>     | 0.15                |
| Vitamin premix <sup>2</sup>     | 0.04                |
| ZnO                             | 0.40                |
| Acidifier                       | 0.70                |
| Total                           | 100.00              |
| Calculated chemical composition |                     |
| Digestible energy, MJ/kg        | 14.44               |
| Analyzed crude protein          | 19.56               |
| Apparent digestible lysine      | 1.14                |

<sup>1</sup> Mineral premix provided the following per kilogram of diet: Zn (ZnO), 50 mg; Cu (CuSO<sub>4</sub>), 20 mg; Mn (MnO), 55 mg; Fe (FeSO<sub>4</sub>), 100 mg; I (KI), 1 mg; Co (CoSO<sub>4</sub>), 2 mg; Se (Na<sub>2</sub>SeO<sub>3</sub>), 0.3 mg.

<sup>2</sup> Vitamin premix provided the following per kilogram of diet: vitamin A, 8255 IU; vitamin D<sub>3</sub>, 2000 IU; vitamin E, 40 IU; vitamin B<sub>1</sub>, 2 mg; vitamin B<sub>2</sub>, 4 mg; pantothenic acid, 15 mg; vitamin B<sub>6</sub>, 10 mg; vitamin B<sub>12</sub>, 0.05 mg; nicotinic acid, 30 mg; folic acid, 2 mg; vitamin K<sub>3</sub>, 1.5 mg; biotin, 0.2 mg; choline chloride, 800 mg; and vitamin C, 100 mg.

Table S2. Body weight of piglets at different stages

| Body weight, kg | Treatments |       | Piglet status |      | SEM  | <i>P</i> -value |        |                  |
|-----------------|------------|-------|---------------|------|------|-----------------|--------|------------------|
|                 | CON        | PE    | NBW           | PGR  |      | Treatment       | Status | Treatment×Status |
| 7 day           | 2.33       | 2.35  | 2.79          | 1.88 | 0.06 | 0.874           | <0.01  | 0.485            |
| 17day           | 4.64       | 4.61  | 5.51          | 3.73 | 0.12 | 0.877           | <0.01  | 0.959            |
| 26 day          | 5.73       | 6.38  | 7.24          | 4.87 | 0.15 | 0.041           | <0.01  | 0.657            |
| 33 day          | 6.73       | 7.34  | 8.12          | 5.96 | 0.16 | 0.065           | 0.012  | 0.686            |
| 40 day          | 8.01       | 9.21  | 9.99          | 7.22 | 0.21 | <0.01           | <0.01  | 0.992            |
| 49 day          | 8.26       | 11.48 | 11.24         | 8.50 | 0.31 | <0.01           | <0.01  | 0.098            |
